# Supplementary material
Source: PubMed Central journal article supplement (PMC7288596)
Supplement: ao0c01012_si_001.pdf [file ao0c01012_si_001.pdf]

# Molecular dynamics simulations for three-dimensional structures of orotate phosphoribosyltransferases constructed from a simplified amino acid set

*Koichi Kato<sup>†,‡</sup>, Tomoki Nakayoshi<sup>†</sup>, Mizuha Sato<sup>†</sup>, Eiji Kurimoto<sup>†</sup>, Akifumi Oda<sup>\*,†,§</sup>*

<sup>†</sup>Faculty of Pharmacy, Meijo University, 150 Yagotoyama, Tempaku-ku, Nagoya, Aichi

468-8503, Japan,

<sup>‡</sup>Department of Pharmacy, Kinjo Gakuin University, 2-1723 Omori, Moriyama-ku, Nagoya,

Aichi 463-8521, Japan,

<sup>§</sup>Institute for Protein Research, Osaka University, 3-2 Yamadaoka, Suita, Osaka 565-0871,

Japan

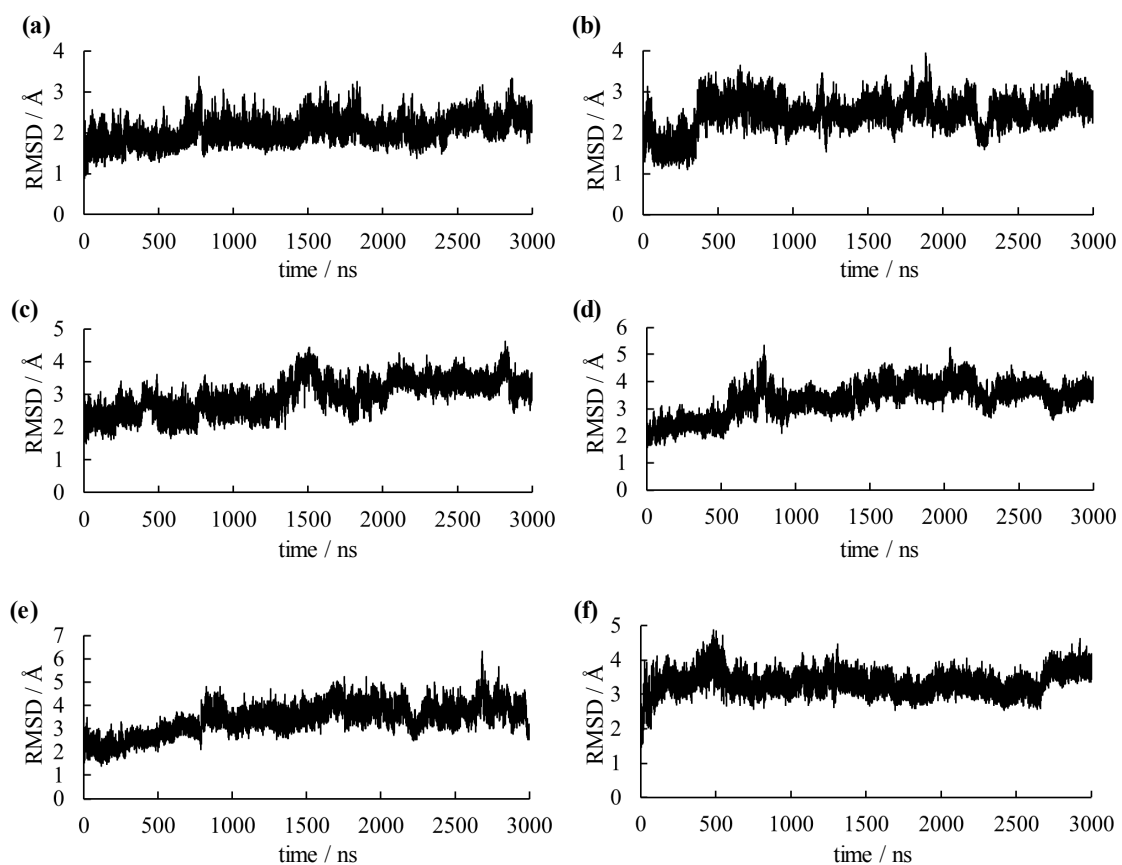

**Figure S1.** Root mean square deviation (RMSD) plots for the main chain atom of OPRase monomers. RMSD plots of (a) wild-type 1, (b) wild-type 2, (c) middle-variant 1, (d) middle-variant 2, (e) Simp-2 1, and (f) Simp-2 2 in monomers.

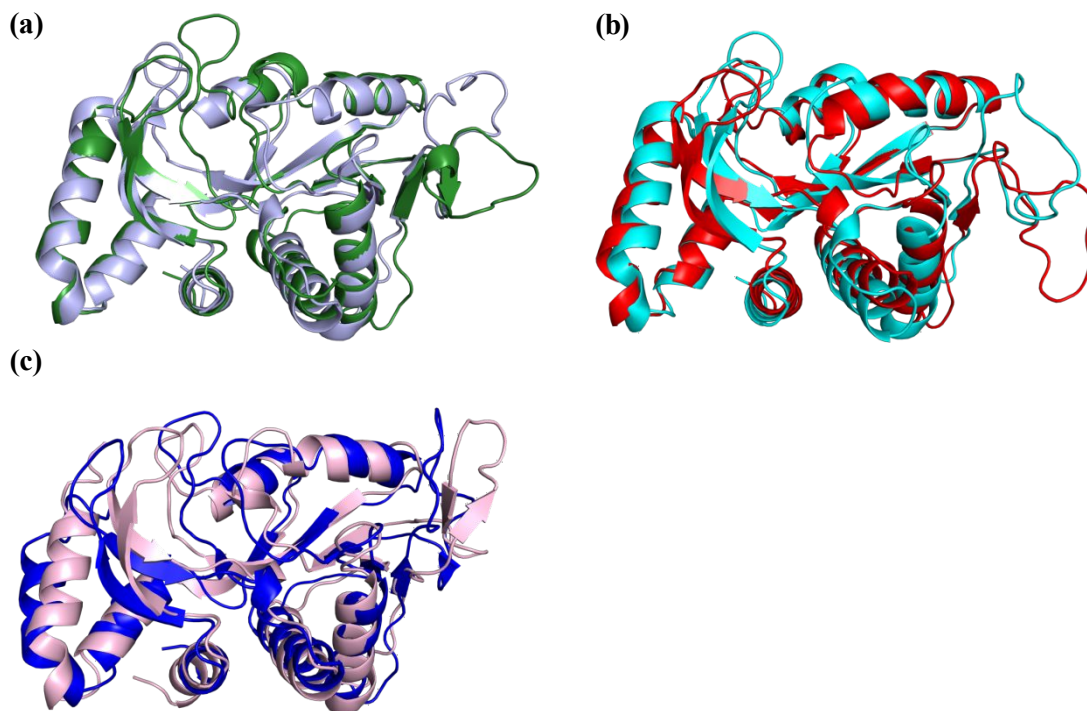

**Figure S2.** Comparison between the calculated monomer structures. The structural superposition of the calculated structures for (a) wild-type 1–wild-type 2, (b) middle-variant 1–middle-variant 2, and (c) Simp-2 1–Simp-2 2. Wild-type 1: green, wild-type 2: light blue, middle variant 1: red, middle variant 2: cyan, Simp-2 1: blue, Simp-2 2: pink.

Table S1. Secondary structure formation in >50% of trajectories for the last 100 ns of simulation for the monomers

|    | wild 1              | wild 2              | middle 1            | middle 2                    | Simp-2 1            | Simp-2 2            |
|----|---------------------|---------------------|---------------------|-----------------------------|---------------------|---------------------|
| H1 | 3-14                | 3-14                | 3-14                | 3-14                        | 3-14                | 3-14                |
| S1 | 18-21,<br>23-24     | 18-21,<br>23-24     | 18-21,<br>23-24     | 18-21,<br>23-24             | 19-21,<br>23-24     | 18-20, 23           |
| S2 | 30-35               | 30-35               | 30-35               | 30-35                       | 30-34               | 31-35               |
| H2 | 37-39               | 37-39               | 37-39               | 37-39                       | 37-39               | 37-39               |
| H3 | 43-59               | 43-59               | 44-59               | 43-60                       | 43-59               | 43-60               |
| S3 | 66-68               | 66-68               | 66-68               | 66-69                       | 66-68               | 66-69               |
| H4 | 75-89               | 75-89               | 75-88               | 74-89                       | 75-88               | 75-89               |
| S4 | 95-98               | 95-98               | 95-96               | 95-97                       | 95                  | 95-97               |
| S5 | 111-113             | 111-113             | not detected        | 112                         | 109-111             | 112-113             |
| S6 | 119-123             | 119-123             | 119-123             | 119-123                     | 119-123             | 119-123             |
| H5 | 132-142             | 134-142             | 132-142             | 129-134,<br>137-142         | 133-142             | 134-142             |
| S7 | 146-147,<br>149-155 | 146-147,<br>149-153 | 146-147,<br>149-154 | 146-147,<br>149-153,<br>155 | 146-147,<br>149-153 | 146-147,<br>149-155 |
| H6 | 166-173             | 168-174             | 166-174             | 169-173                     | 166-173             | 167-174             |
| S8 | 177-183             | 179-182             | 177-182             | 177-181,<br>183             | 177-181,<br>183     | 177-183             |
| H7 | 184-191             | 184-191             | 184-191             | 184-192                     | 184-192             | 184-193             |
| H8 | 195-211             | 195-210             | 195-210             | 195-210                     | 198-209             | 195-206,<br>210-211 |

H: Helix ( $\alpha$ -helix and 3-10 helix ), S: para and anti  $\beta$ -sheet



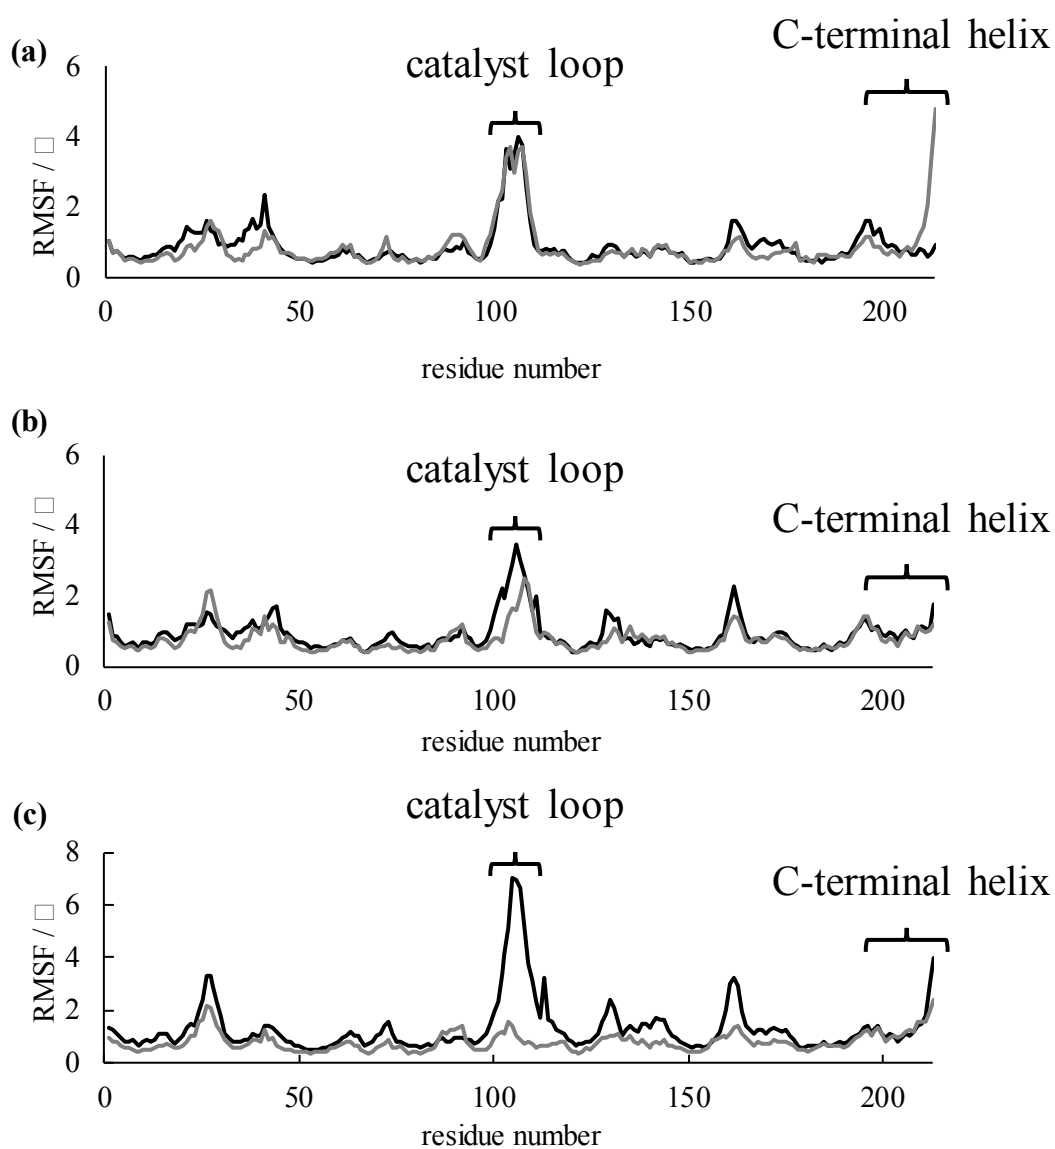

**Figure S3.** Comparison of root mean square fluctuations (RMSFs) between monomers 1 and 2. The RMSF plots of monomers in (a) the wild type, (b) the middle variant, and (c) Simp-2. The plots of monomer 1 and monomer 2 are indicated by black and gray lines, respectively.
